# Supplementary material for: Near room temperature thermoelectric performance improvement for Mg2Sn
Source: Royal Society of Chemistry journal article supplement (doi:10.1039/d4tc00761a), 2024-01-01
Supplement: d4tc00761a1.pdf [file d4tc00761a1.pdf]

## Supplementary

### Near room temperature Thermoelectric performance improvement for $\text{Mg}_2\text{Sn}$

Lin Zhang<sup>1,2,#</sup>, Juan Li<sup>2,#,\*</sup>, Hongyi Chen<sup>1,\*</sup>, Jianghe Feng<sup>2</sup> and Ruiheng Liu<sup>2</sup>

<sup>1</sup>College of Chemistry and Chemical Engineering, Central South University, Changsha 410083, China

<sup>2</sup>Shenzhen Institute of Advanced Electronic Materials, Shenzhen Institute of Advanced Technology, Chinese Academy of Sciences, Shenzhen 518055, China

# These authors contribute equally to this work.

\*Corresponding authors: hy.Chen@csu.ac.cn, j.li1@siat.ac.cn

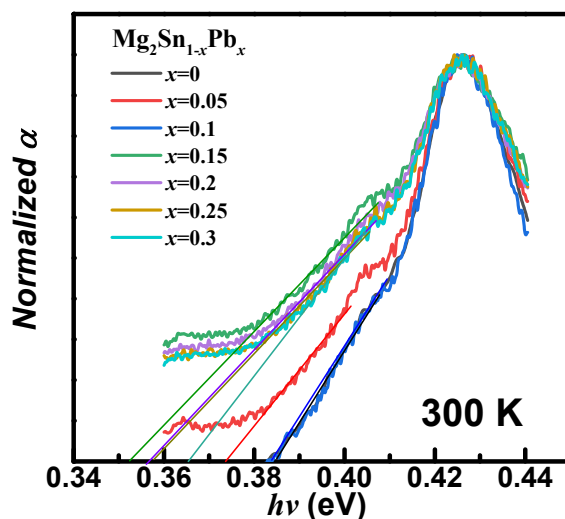

Fig. S1. The normalized inferred absorption peak of  $\text{Mg}_2\text{Sn}_{1-x}\text{Pb}_x$  ( $0 \leq x \leq 0.3$ ) samples at room temperature, indicating the decrease of band gap by Pb alloying.

The calculation process of Lorenze number:

$$L_e = \left(\frac{k_B}{e}\right)^2 \left[ \frac{\left(r + \frac{7}{2}\right) F_{r+\frac{5}{2}}(\xi_e)}{\left(r + \frac{3}{2}\right) F_{r+\frac{1}{2}}(\xi_e)} - \frac{\left(r + \frac{5}{2}\right) F_{r+\frac{3}{2}}(\xi_e)}{\left(r + \frac{3}{2}\right) F_{r+\frac{1}{2}}(\xi_e)} \right]^2 \#(1-1)$$

$$L_h = \left(\frac{k_B}{e}\right)^2 \left[ \frac{\left(r + \frac{7}{2}\right) F_{r+\frac{5}{2}}(\xi_h)}{\left(r + \frac{3}{2}\right) F_{r+\frac{1}{2}}(\xi_h)} - \frac{\left(r + \frac{5}{2}\right) F_{r+\frac{3}{2}}(\xi_h)}{\left(r + \frac{3}{2}\right) F_{r+\frac{1}{2}}(\xi_h)} \right]^2 \#(1-2)$$

$$S = \pm \left( \frac{\left(r + \frac{5}{2}\right) F_{r+\frac{3}{2}}(\xi_e)}{\left(r + \frac{3}{2}\right) F_{r+\frac{1}{2}}(\xi_e)} - \xi_e \right) h \#(1-3)$$

$$\xi_h = - \left( \frac{E_g}{k_B T} + \xi_e \right) \#(1-4)$$

# Supplementary

$$n = 2 \left( \frac{2\pi m_e^* k_B T}{h^2} \right) F_{1/2}(\xi_e) \#(1-5)$$

$$p = 2 \left( \frac{2\pi m_h^* k_B T}{h^2} \right) F_{1/2}(\xi_h) \#(1-6)$$

$$(n_{300K} + \Delta) (p_{300K} + \Delta) = AT^3 \exp\left(-\frac{E_g}{k_B T}\right) \#(1-7)$$

Here, the  $r$  is the scattering parameter for the carrier transport based on the relaxation time approximation, where the acoustic phonon ( $r = -1/2$ ) scattering dominants. The reduced Fermi energy  $\xi_e$  and  $\xi_h$  near room temperature could be estimated from the Seebeck coefficient on the basis of single band approximation formula Eq. (1-3 and 1-4). The reduced Fermi energy  $\xi(T)$  at the higher temperature is obtained by Eq. (1-4~1-7) at a given temperature.

$m_e^*$  was obtained from the measured carrier concentration and Seebeck coefficient of  $\text{Mg}_{2.03}\text{Sn}_{1-x}\text{Pb}_x$  in this study, while  $m_h^* = 1.3 m_0$  was used.

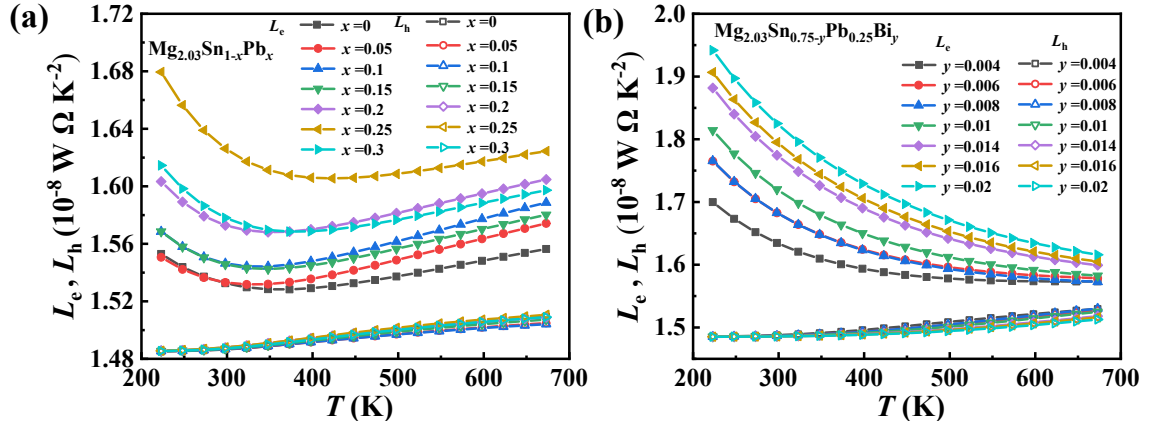

Fig. S2. The temperature dependent  $L_e$ ,  $L_h$  of  $\text{Mg}_{2.03}\text{Sn}_{1-x}\text{Pb}_x$  ( $0 \leq x \leq 0.05$ ) (a) and  $\text{Mg}_{2.03}\text{Sn}_{0.75-y}\text{Pb}_{0.25}\text{Bi}_y$  ( $0 \leq y \leq 0.02$ ) (b) samples in this work.

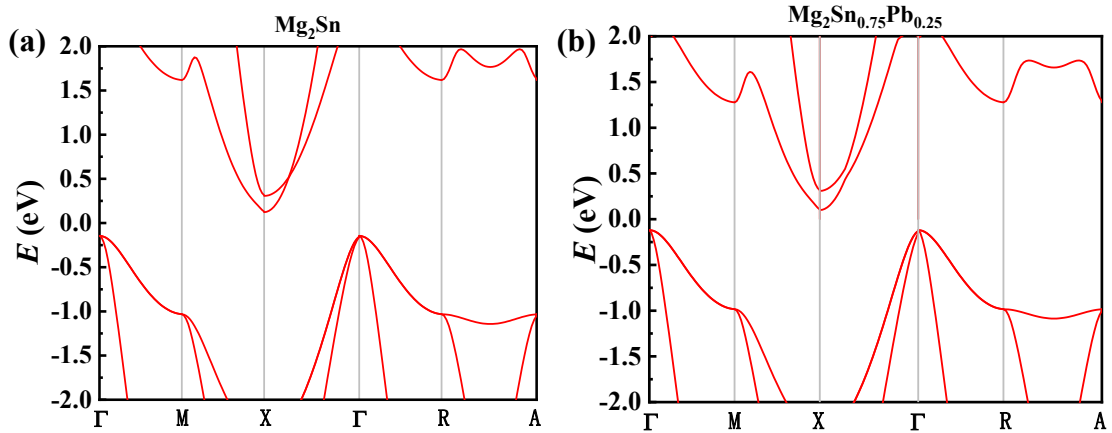

Fig. S3. The first-principle calculated band structure of  $\text{Mg}_2\text{Sn}$ (a) and  $\text{Mg}_2\text{Sn}_{0.75}\text{Pb}_{0.25}$  (b) .
